# Supplementary material
Source: PubMed Central journal article supplement (PMC5474223)
Supplement: NIHMS828650-supplement-1.pdf [file NIHMS828650-supplement-1.pdf]

Supplemental Material to

**Histone Deacetylase Inhibitors Interrupt HSP90•RASGRP1 and HSP90•CRAF Interactions to Upregulate BIM and Circumvent Drug Resistance in Lymphoma Cells**

Husheng Ding, Kevin L. Peterson, Cristina Correia, Brian Koh,  
Paula A. Schneider, Grzegorz S. Nowakowski, and Scott H. Kaufmann

## Supplemental Method

**Immunoprecipitation.** To assess changes in binding of proteins to HSP90, Jurkat cells were treated with diluent or 20 nM romidepsin for 6 h in the presence of 5  $\mu$ M Q-VD-Oph. At the completion of the incubation, cells were washed in ice cold RPMI-HEPES and solubilized for 30 min at 4° C in lysis buffer consisting of 1% (w/v) 3-[(3-cholamidopropyl)dimethylammonio]-1-propanesulfonate (CHAPS), 20 mM HEPES (pH 7.4), 150 mM NaCl, 1% (v/v) glycerol, 1 mM PMSF, 10  $\mu$ g/ml leupeptin, 10  $\mu$ g/ml pepstatin, 100 mM NaF, 10 mM sodium pyrophosphate, 1 mM sodium vanadate and 20 nM microcystin. After sedimentation of insoluble material at 14000 x *g* for 15 min, aliquots of supernatant containing 1000  $\mu$ g protein were incubated overnight at 4° C with anti-HSP90 that was precoupled to protein G-agarose beads using dimethyl pimelimidate. Beads were sedimented at 400 x *g* for 5 min, washed five times in lysis buffer, and heated for 20 min at 65° C in SDS sample buffer consisting of 4 M urea, 2% (w/v) SDS, 62.5 mM Tris-HCl (pH 6.8), 1 mM EDTA and 5% (v/v) 2-mercaptoethanol to release bound polypeptides.

| <b>Table S1</b>                                          |                       |                                              |
|----------------------------------------------------------|-----------------------|----------------------------------------------|
| <b>Sources of Commercial Antibodies</b>                  |                       |                                              |
| <b>Antibody</b>                                          | <b>Product number</b> | <b>Vendor</b>                                |
| Phospho-Thr <sup>202</sup> /Tyr <sup>204</sup> : -ERK1/2 | 9101S                 | Cell Signaling Technology<br>(Beverly, MA)   |
| ERK1/2                                                   | 9102S                 |                                              |
| Phospho-Ser <sup>217</sup> /Ser <sup>221</sup> -MEK1/2   | 9121S                 |                                              |
| MEK1/2                                                   | 4694S                 |                                              |
| BAX                                                      | 2772S                 |                                              |
| BIM                                                      | 2819S                 |                                              |
| BID                                                      | 2002S                 |                                              |
| MCL1                                                     | 4572S                 |                                              |
| BCLX <sub>L</sub>                                        | 2764S                 |                                              |
| Cleaved caspase 3                                        | 9661S                 |                                              |
| PARP1                                                    | 9532S                 |                                              |
| HSP70                                                    | ADI-SPA-810D          |                                              |
| NOXA                                                     | ALX-804-408-C100      |                                              |
| BAK                                                      | 06-536                | Millipore (Billerica, MA)                    |
| CRAF                                                     | sc-133                | Santa Cruz Biotechnology<br>(Santa Cruz, CA) |
| PUMA                                                     | sc-374223             |                                              |
| BCL2 (rabbit polyclonal)                                 | sc-492                |                                              |
| BCL2 (murine monoclonal)                                 | Clone 124             | Dako (Carpenteria, CA)                       |
| Acetylated tubulin                                       | T6793                 | Sigma-Aldrich<br>(St. Louis, MO)             |
| α-tubulin                                                | T9026                 |                                              |
| Acetylated lysine                                        | 200-301-A97           | Rockland (Limerick, PA)                      |
| Cytochrome c                                             | 556433                | BD Biosciences<br>(Franklin Lakes, NJ)       |
| Cytochrome oxidase subunit IV                            | 20E8-C12              | Thermo (Waltham, MA)                         |

**Table S2****Lymphoid Cell Lines Used in This Study**

| <b>Cell line</b> | <b>Dx<sup>a</sup></b>                            | <b>Age<sup>b</sup></b> | <b>Sex</b> | <b><i>BCL2</i> Status<sup>c</sup></b> |
|------------------|--------------------------------------------------|------------------------|------------|---------------------------------------|
| DoHH2            | Centroblastic/centrocytic non-Hodgkin's Lymphoma | 60                     | M          | Wild Type                             |
| Daudi            | Burkitt's Lymphoma                               | 16                     | M          | Wild Type                             |
| HS445            | Hodgkin's Lymphoma                               | 56                     | F          | Wild Type                             |
| HT               | Diffuse mixed B cell lymphoma                    | 70                     | M          | Wild Type                             |
| Jeko             | Mantle Cell Lymphoma                             | 78                     | F          | Wild Type                             |
| Karpas 422       | DLBCL                                            | 71                     | M          | Mutant                                |
| Nalm6            | pre-B cell (ALL)                                 | 19                     | M          | Wild Type                             |
| SKW6.4           | MZL                                              | 65                     | F          | Wild Type                             |
| SuDHL-4          | DLBCL                                            | 38                     | M          | Mutant                                |
| SuDHL-6          | DLBCL                                            | 60                     | M          | Mutant                                |
| RL               | B cell-Non Hodgkin's                             | 52                     | M          | Mutant                                |
| WSU-DLCL2        | DLBCL                                            | 46                     | F          | Mutant                                |
| Jurkat           | Acute T-cell Leukemia                            | 14                     | M          | Wild Type                             |

<sup>a</sup>Abbreviations used: ALL, acute lymphoblastic leukemia; DLBCL, diffuse large B-cell lymphoma; MZL, splenic marginal zone lymphoma.

<sup>b</sup>Age and sex of patient from whom the line was established.

<sup>c</sup>From COSMIC database (<http://www.sanger.ac.uk/genetics/CGPF/cosmic/>), confirmed by Sanger sequencing.

**Table S3****Clinical Samples of Lymphoid Malignancies Used in This Study**

| Pt # <sup>a</sup> | Dx <sup>b</sup> | Age | Sex | Stage | %<br>Lymphoma<br>cells | Prior<br>treatment <sup>c</sup> | Tissue source |
|-------------------|-----------------|-----|-----|-------|------------------------|---------------------------------|---------------|
| #1                | MZL             | 82  | M   | IV    | 50%                    | None                            | Splenectomy   |
| #2                | BL, low grade   | 64  | M   | IV    | 75%                    | R-CHOP, BR                      | Splenectomy   |
| #3a <sup>d</sup>  | FL, grade 1     | 60  | F   | II    | 60%                    | None                            | Lymph node    |
| #3b               | FL, grade 1     | 62  | F   | II    | 66%                    | Rituximab                       | Lymph node    |
| #4                | FL, grade 1     | 62  | M   | IV    | 38%                    | None                            | Splenectomy   |
| #5                | CLL/SLL         | 66  | F   | IV    | 73%                    | PCR                             | Lymph node    |
| #6                | DLBCL           | 71  | M   | II    | 80%                    | None                            | Splenectomy   |
| #7                | MZL             | 65  | F   | IV    | 54%                    | None                            | Splenectomy   |
| #8                | FL              | 61  | F   | II    | 60%                    | CHOP x 3, RT                    | Lymph node    |
| #9                | MZL             | 60  | F   | IV    | 88%                    | None, initial dx                | Splenectomy   |
| #10               | PTLD            | 64  | F   |       |                        | None                            | Splenectomy   |
| #11               | T LBL           | 25  | M   | III   | 98%                    | Hyper-CVAD                      | Lymph node    |

<sup>a</sup>The same patient designations are used in this table, **Fig. 7a** and **Fig. S7**.

<sup>b</sup>Abbreviations used: BL, low grade; low grade B-cell lymphoma; BL-NOS, B-cell lymphoma, not otherwise classifiable; CLL/SLL, chronic lymphocytic leukemia, small lymphocytic lymphoma; FL, follicular lymphoma; MZL, splenic marginal zone lymphoma; T LBL, T-cell lymphoblastic lymphoma; PTLD, post-transplant lymphoproliferative disorder.

<sup>c</sup>Abbreviations for treatments are: BR, bendamustine/rituximab; CHOP, cyclophosphamide, doxorubicin, vincristine and prednisone; HyperCVAD, hyperfractionated cyclophosphamide, vincristine, doxorubicin and dexamethasone alternating with high dose methotrexate and cytarabine; PCR, pentostatin, cyclophosphamide and rituximab; RT, radiation therapy.

<sup>d</sup>Samples 3a and 3b are two samples from the same patient at two time points with intervening treatment (see **Fig. S7**).

## SUPPLEMENTAL FIGURES AND LEGENDS

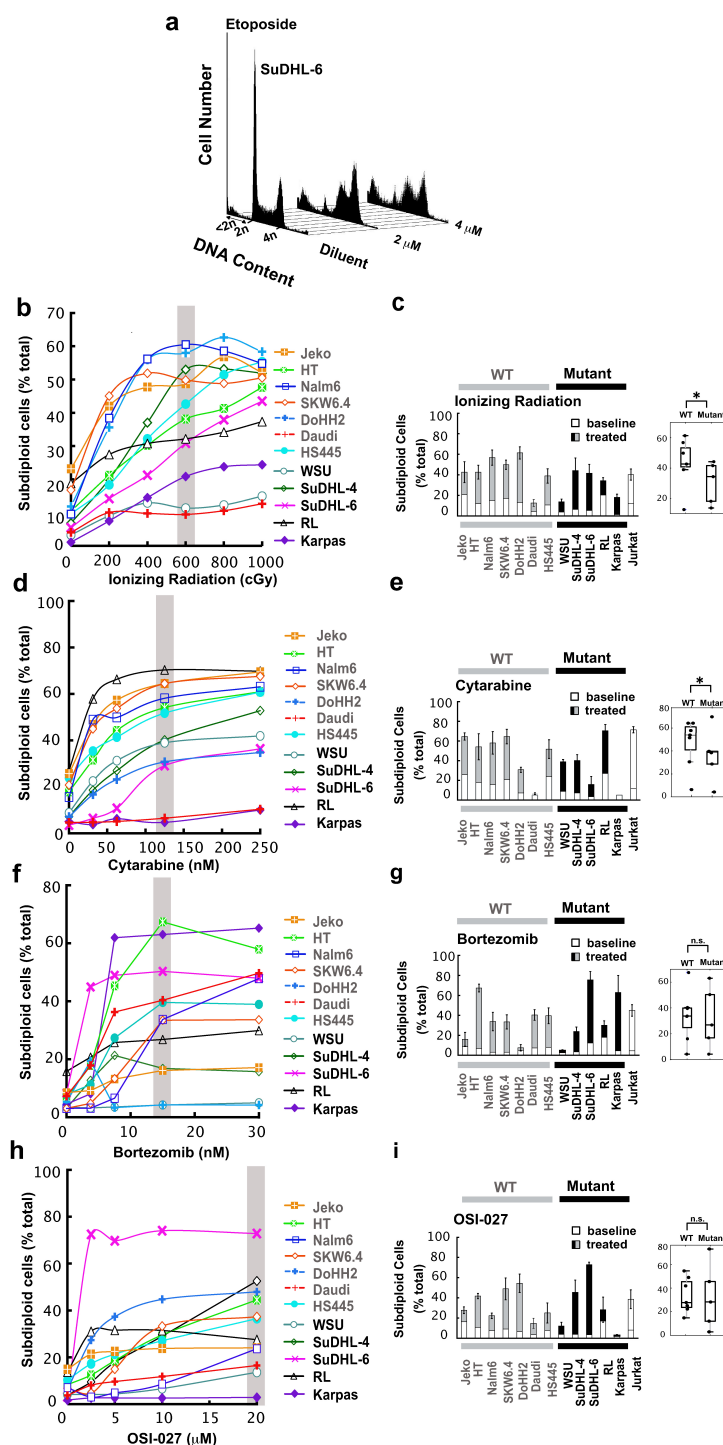

**Figure S1. Sensitivity of malignant lymphoid cell lines to etoposide, ionizing radiation, cytarabine, bortezomib and OSI-027 (related to Fig. 1).** (a) SuDHL-6 cells were treated for 24 h with diluent, 2  $\mu$ M etoposide, or 4  $\mu$ M etoposide, then stained with propidium iodide and subjected to flow microfluorimetry. Results are representative of data used to generate summary graphs in **Figs. 1-3** as well as subsequent supplemental figures. (b, d, f, h) Cells were treated with the indicated concentrations of ionizing radiation (b), cytarabine (d), bortezomib (f),

or OSI-027 (**h**) and then harvested after 24 h (**b, f**), 48 h (**h**) or 72 h (**d**), timepoints chosen based on preliminary time course experiments. Curves shown are representative of 3 independent experiments. Grey bars indicate the drug concentration used for the box plots in panels **c, e, g, and i**. (**c, e, g, i**) Effects of ionizing radiation (600 cGy, 24 h before assay), cytarabine (125 nM, 72 h), bortezomib (15 nM, 24 h), or OSI-027 (20  $\mu$ M, 48 h) on the number of subdiploid cells. Errors bars indicate mean  $\pm$  SD of three independent experiments. \*,  $p < 0.05$ . n.s., not significant.

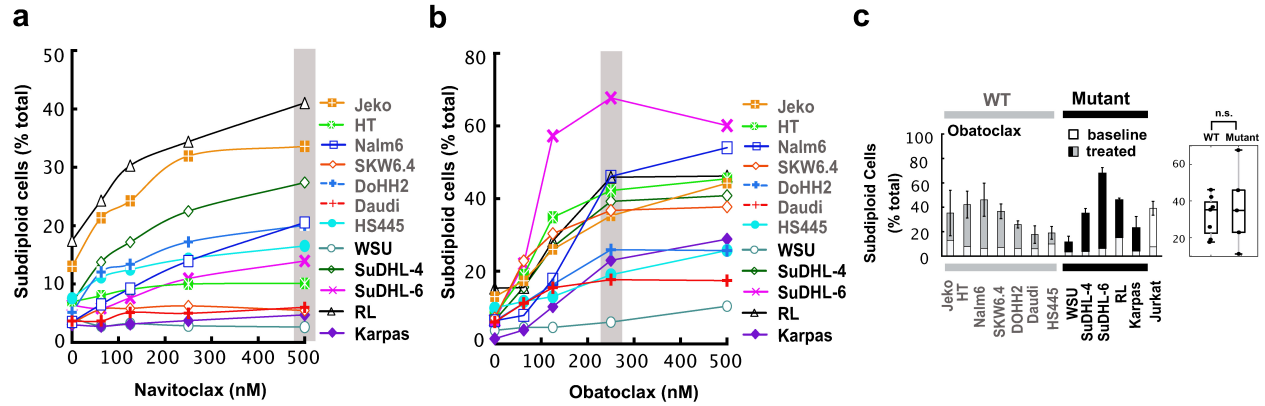

**Figure S2. Sensitivity of malignant lymphoid cell lines to navitoclax and obatoclax** (related to **Fig. 2**). Cells were treated for 48 h with the indicated concentrations of navitoclax (**a**) or obatoclax (**b**) and analyzed for subdiploid events by flow cytometry as illustrated in **Fig. S1a**. Curves shown are representative of 3 independent experiments. Grey bars indicate the concentration of navitoclax (500 nM) or obatoclax (250 nM) used for the box plots in panel **c** and **Fig. 2c**. Error bars in panel **c** indicate mean  $\pm$  SD of three independent experiments, n.s., not significant.



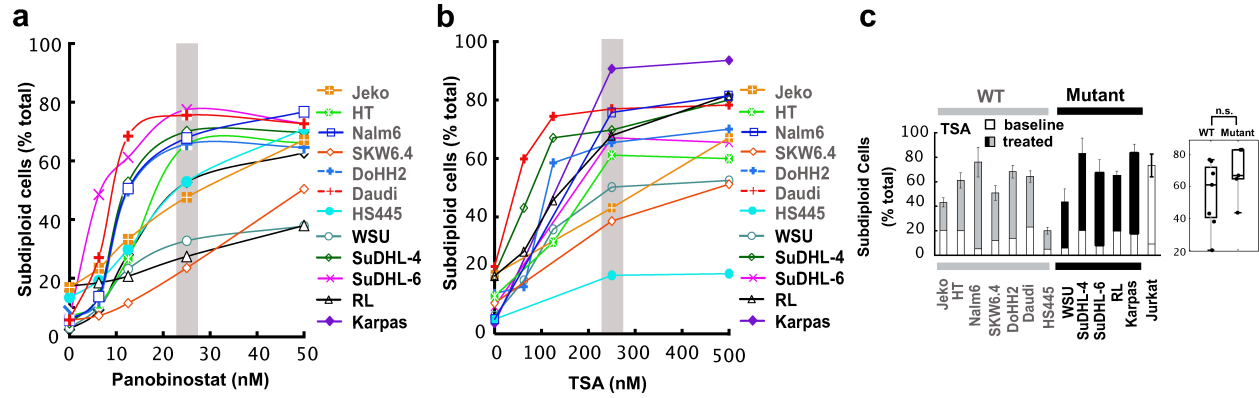

**Figure S3. Sensitivity of malignant lymphoid cell lines to panobinostat and TSA** (related to Fig. 3). Cells were treated for 48 h with the indicated concentrations of panobinostat (**a**) and TSA (**b**) and analyzed for subdiploid events by flow cytometry as illustrated in Fig. S1a. Curves shown are representative of 3 independent experiments. Grey bars indicate the drug concentrations (panobinostat 25 nM, TSA 250 nM) used for the box plots in panel **c** and Fig. 3c. Error bars in panel **c** indicate mean  $\pm$  SD of three independent experiments, n.s., not significant.

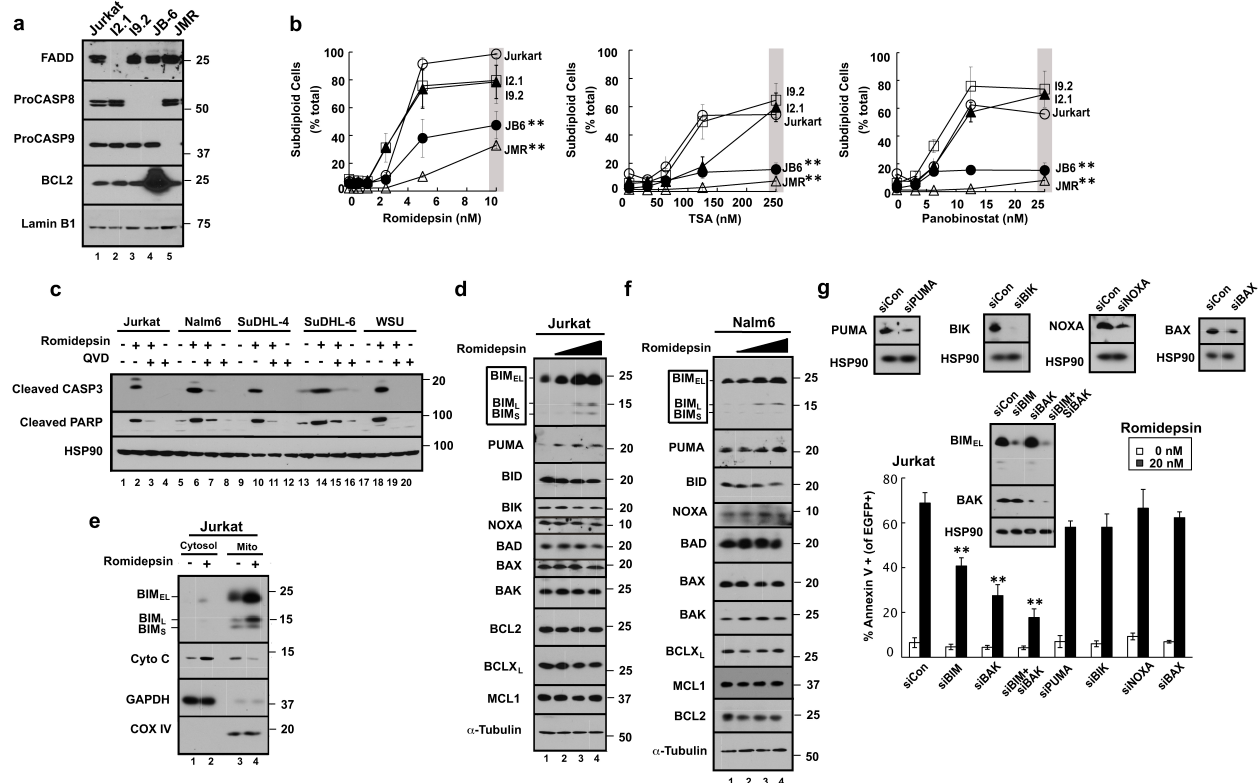

**Figure S4. HDAC inhibitor-induced killing depends on BIM** (related to Fig. 4). (a) Whole cell lysates from Jurkat cells or their derivatives were subjected to immunoblotting for the indicated antigens. Lamin B1 served as a loading control. (b) Jurkat and Jurkat variants were treated with the indicated concentrations of romidepsin for 72 h, TSA for 48 h or panobinostat for 48 h before staining with propidium iodide and flow microfluorimetry. Grey bars indicate the drug concentration used for *t*-test. (c) The indicated cells were treated with diluent (0.1% DMSO) or 20 nM romidepsin in the presence (+) or absence (-) of 5  $\mu$ M Q-VD-Oph for 24 h and subjected to immunoblotting. HSP90 served as a loading control. (d and f) Western blots showing protein levels in Jurkat (d) and Nalm6 (f) cells upon treatment with romidepsin (0, 5, 10, 20 nM) in the presence 5  $\mu$ M Q-VD-Oph for 24 h. (e) After Jurkat cells were treated with diluent (0.1% DMSO) or 20 nM romidepsin (+) in the presence of 5  $\mu$ M Q-VD-Oph for 24 h, the indicated subcellular fractions were isolated and subjected to immunoblotting. GAPDH and cytochrome c oxidase subunit IV (COX IV) served as markers for cytosol and mitochondria, respectively. (g) 24 hours after transfection of the indicated siRNAs along with plasmid encoding EGFP-histone H2B (to mark successfully transfected cells), Jurkat cells were treated for 24 h with 20 nM romidepsin before staining with APC-conjugated annexin V and analysis by 2-color flow cytometry. Shown are the percentages of EGFP<sup>+</sup> (successfully transfected) cells that are annexin V<sup>+</sup>. Additional results can be found in Fig. S5. Above the graph are immunoblots of whole cell lysates prepared from siRNA-treated cells incubated in drug-free medium in parallel with samples harvested for flow cytometry. HSP90 served as loading control. Error bars in panels b and g indicate mean  $\pm$  SD of three independent experiments. \*\* in panels b and g,  $p < 0.01$  relative to parental Jurkat cells (b) or siRNA control (g).

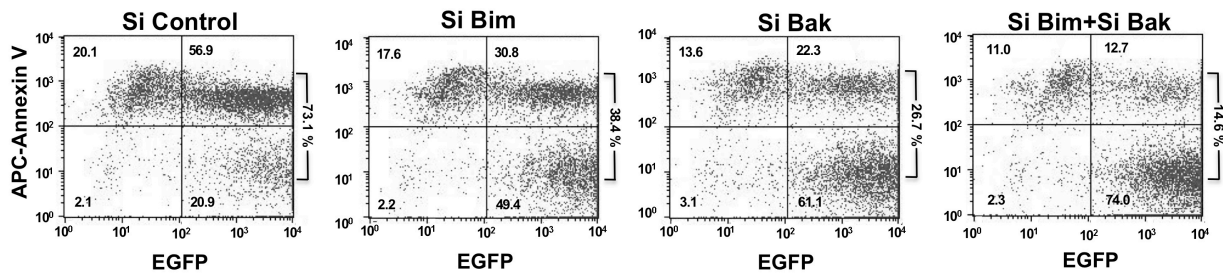

**Figure S5. Effect of knockdown of BIM, BAK and BIM + BAK on romidepsin sensitivity** (related to **Fig. S4g**). Beginning 24 h after transfection with the indicated siRNA + 5  $\mu$ g of plasmid encoding EGFP-Histone H2B, Jurkat cells were treated for 24 h with 20 nM romidepsin, stained with APC-conjugate annexin V and analyzed by two-color flow cytometry. Numbers in each quadrant indicated % of events. Numbers at right indicate % of EGFP<sup>+</sup> cells that are annexin V-positive after romidepsin treatment.

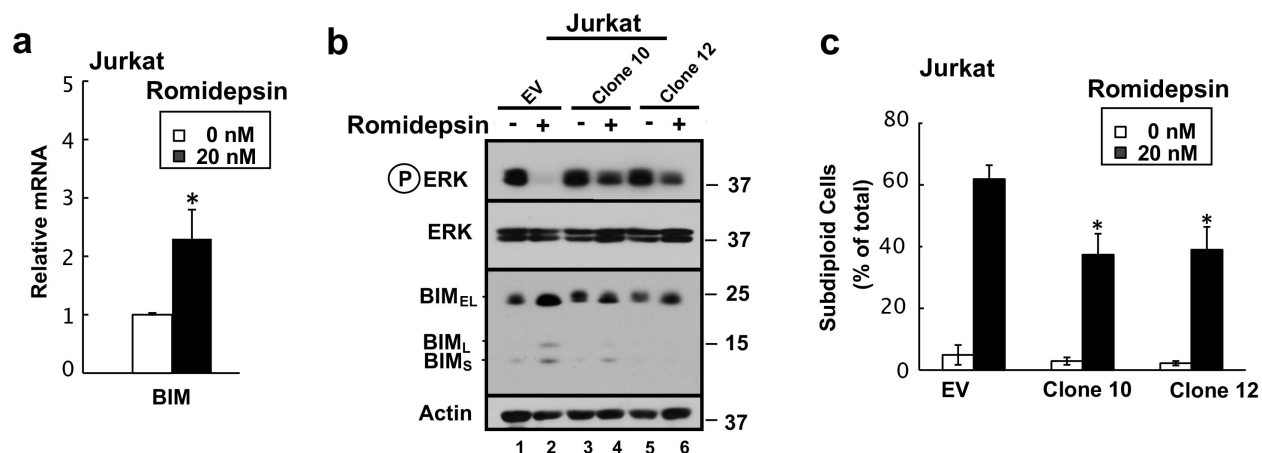

**Figure S6. HDAC inhibitor-induced killing is diminished by activated MEK** (related to **Figs. 4** and **S4**). **(a)** After Jurkat cells were treated with diluent or 20 nM romidepsin for 24 h, BIM mRNA levels were quantified by qRT-PCR and normalized to GAPDH mRNA. **(b)** After Jurkat cells were transfected with empty vector (EV) or constitutively active MEK1 (clones 10 and 12) and treated with diluent (0.1% DMSO, -) or 20 nM romidepsin (+) in the presence of 5  $\mu$ M Q-VD-OPh for 24 h, whole cell lysates were subjected to immunoblotting with the indicated antibodies. **(c)** After the indicated clones were treated 24 h with diluent or 20 nM romidepsin, samples were stained with propidium iodide and subjected to flow microfluorimetry. Error bars in panels a and c indicate mean  $\pm$  SD of three independent experiments. \*,  $p < 0.05$  relative to empty vector.

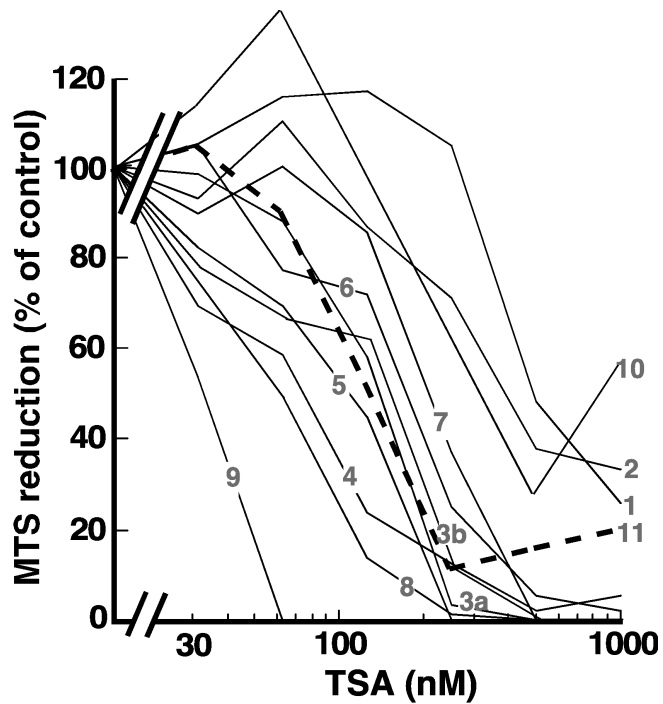

**Figure S7. Effect of TSA on survival of clinical B-cell lymphoma samples *ex vivo*** (related to Fig. 7). B-cell lymphoma specimens (solid lines) and T cell lymphoma specimens (dashed lines) were treated with the indicated concentrations of TSA for 5 days *ex vivo* and assayed for relative cell survival using MTS assays. Numbers in grey correspond to patient numbers in **Table S3**. Samples 3a and 3b came from the same patient at two points in time.
